# Supplementary material
Source: PubMed Central journal article supplement (PMC2964975)
Supplement: JCI42758sd.pdf [file JCI42758sd.pdf]

# Supplemental Table 1: Enriched GO categories per cluster

| Cluster   | Enriched with                                        | #genes | Raw p-value | Corrected p-value | Frequency in set (%) |
|-----------|------------------------------------------------------|--------|-------------|-------------------|----------------------|
| Cluster 1 | immune response - GO:0006955                         | 32     | 2.36E-14    | 0.001             | 13.5                 |
| Cluster 1 | cellular defense response - GO:0006968               | 12     | 1.10E-11    | 0.001             | 5.06                 |
| Cluster 1 | defense response - GO:0006952                        | 25     | 3.21E-10    | 0.001             | 10.54                |
| Cluster 1 | cell motility - GO:0006928                           | 18     | 5.36E-08    | 0.001             | 7.59                 |
| Cluster 1 | cytolysis - GO:0019835                               | 5      | 4.71E-07    | 0.002             | 2.1                  |
| Cluster 1 | leukocyte chemotaxis - GO:0030595                    | 5      | 3.02E-06    | 0.005             | 2.1                  |
| Cluster 1 | taxis - GO:0042330                                   | 10     | 3.27E-06    | 0.007             | 4.21                 |
| Cluster 1 | viral genome replication - GO:0019079                | 5      | 3.88E-06    | 0.008             | 2.1                  |
| Cluster 1 | cell adhesion - GO:0007155                           | 22     | 3.88E-06    | 0.008             | 9.28                 |
| Cluster 1 | extracellular space - GO:0005615                     | 18     | 5.30E-06    | 0.008             | 7.59                 |
| Cluster 1 | signal transducer activity - GO:0004871              | 44     | 8.09E-06    | 0.014             | 18.56                |
| Cluster 1 | antigen processing - GO:0002504                      | 4      | 1.02E-05    | 0.018             | 1.68                 |
| Cluster 2 | mitotic cell cycle - GO:0000278                      | 15     | 9.04E-18    | 0.001             | 30.61                |
| Cluster 2 | cell cycle - GO:0007049                              | 19     | 2.84E-15    | 0.001             | 38.77                |
| Cluster 2 | microtubule cytoskeleton - GO:0015630                | 10     | 2.08E-09    | 0.001             | 20.4                 |
| Cluster 2 | cell cycle checkpoint - GO:0000075                   | 5      | 9.40E-08    | 0.001             | 10.2                 |
| Cluster 2 | microtubule-based process - GO:0007017               | 7      | 1.58E-07    | 0.001             | 14.28                |
| Cluster 2 | spindle organization and biogenesis - GO:0007051     | 4      | 1.62E-07    | 0.001             | 8.16                 |
| Cluster 2 | establishment of organelle localization - GO:0051656 | 4      | 1.96E-07    | 0.001             | 8.16                 |
| Cluster 2 | chromosome segregation - GO:0007059                  | 4      | 7.34E-06    | 0.014             | 8.16                 |
| Cluster 3 | regulation of metabolic process - GO:0019222         | 28     | 3.69E-05    | 0.046             | 25                   |
| Cluster 4 | immune response - GO:0006955                         | 6      | 2.57E-06    | 0.004             | 33.33                |

Each of the four clusters of Figure 1C was analyzed for enrichment of GO categories using the TANGO algorithm in Expander. Only GO categories are reported that are significant after correction for multiple testing (corrected  $P \leq 0.05$ ). # genes: number of genes that appear in the cluster and that are also annotated with the GO annotation. Raw P-value: hypergeometric enrichment P-value. Corrected P-value: significance level after the multiple testing correction performed by TANGO. Frequency in set: percentage of genes in a cluster that are annotated with the GO annotation.

## Supplemental Table 2

### Changes in expression of different categories of genes: Cell cycle

| Gene symbol   | Alias       | Accession Nr. | Primary CMV infection |             | Healthy HCMV <sup>+</sup> donor | Healthy HCMV <sup>+</sup> donor |             |
|---------------|-------------|---------------|-----------------------|-------------|---------------------------------|---------------------------------|-------------|
|               |             |               | Peak                  | 1 year      | Latency                         | Effector type                   | Memory      |
| <b>TYMS</b>   |             | NM_001071     | 109.5                 | 10.8        | 7.3                             | <i>1.1</i>                      | <i>1.6</i>  |
| <b>CDCA7</b>  | JPO1        | NM_031942     | 82.3                  | 17.1        | 8.8                             | <i>1.4</i>                      | <i>2.2</i>  |
| <b>UHRF1</b>  |             | NM_013282     | 55.5                  | 2.7         | 1.3                             | <i>1.0</i>                      | <i>-1.5</i> |
| <b>SAP30</b>  |             | NM_003864     | 29.9                  | 24.0        | 17.7                            | 13.7                            | 7.9         |
| <b>NCAPG</b>  | Condensin G | NM_022346     | 27.7                  | 7.6         | 2.4                             | <i>1.0</i>                      | <i>1.5</i>  |
| <b>MKI67</b>  | Ki67        | NM_002417     | 23.1                  | 2.3         | <i>-1.0</i>                     | <i>-1.5</i>                     | <i>-1.0</i> |
| <b>RBBP8</b>  | CtIP        | NM_002894     | 17.3                  | 2.8         | 1.7                             | 3.4                             | 4.8         |
| <b>CDCA5</b>  |             | NM_080668     | 15.6                  | 1.3         | 1.7                             | <i>1.4</i>                      | <i>1.9</i>  |
| <b>CDC6</b>   |             | NM_001254     | 15.4                  | 1.6         | 1.3                             | <i>-1.0</i>                     | <i>-1.1</i> |
| <b>BIRC5</b>  | Survivin    | BC000784      | 15.4                  | 1.1         | 1.2                             | <i>1.1</i>                      | <i>1.0</i>  |
| <b>CEP55</b>  |             | NM_018131     | 15.0                  | 2.0         | <i>-1.1</i>                     | <i>1.0</i>                      | <i>1.6</i>  |
| <b>TK1</b>    |             | NM_003258     | 14.9                  | 1.7         | 1.4                             | <i>1.2</i>                      | <i>1.1</i>  |
| <b>MCM4</b>   |             | NM_005914     | 14.0                  | 2.3         | 2.7                             | <i>1.6</i>                      | <i>1.4</i>  |
| <b>CENPF</b>  | Mitosin     | NM_016343     | 13.8                  | 1.1         | 1.2                             | <i>-1.3</i>                     | <i>1.3</i>  |
| <b>G0S2</b>   |             | NM_015714     | 10.6                  | 18.2        | 29.5                            | <i>-1.9</i>                     | <i>1.5</i>  |
| <b>NUSAP1</b> |             | NM_018454     | 10.3                  | 2.4         | 3.1                             | <i>1.1</i>                      | <i>1.3</i>  |
| <b>CDC2</b>   |             | NM_001786     | 10.2                  | 1.4         | 1.6                             | <i>1.1</i>                      | <i>1.2</i>  |
| <b>CDC7</b>   |             | NM_003503     | 6.2                   | 3.5         | 3.0                             | <i>1.6</i>                      | <i>1.3</i>  |
| <b>DTYMK</b>  | CDC8        | AF258562      | 5.4                   | 3.0         | 1.3                             | <i>-1.3</i>                     | <i>-2.2</i> |
| <b>MCM10</b>  |             | AB042719      | 5.0                   | <i>-1.1</i> | 1.0                             | <i>1.1</i>                      | <i>1.0</i>  |
| <b>CDC50B</b> |             | AK091169      | -7.3                  | -6.1        | -4.5                            | <i>1.6</i>                      | <i>1.3</i>  |
| <b>TCEAL3</b> |             | NM_032926     | -12.4                 | -5.6        | -3.0                            | <i>1.4</i>                      | <i>1.5</i>  |
| <b>CSNK1D</b> |             | NM_152675     | -13.5                 | -9.1        | -15.0                           | <i>1.5</i>                      | <i>1.3</i>  |

Numbers denote mean changes of replicate samples compared to the pool of purified naive CD8<sup>+</sup> T cells. Fold changes < 2 are denoted in italics.

## Supplemental Table 3

### Changes in expression of different categories of genes: Metabolism

| Gene symbol | Alias | Accession Nr. | Primary CMV infection |            | Healthy HCMV <sup>+</sup> donor | Healthy HCMV <sup>+</sup> donor |             |
|-------------|-------|---------------|-----------------------|------------|---------------------------------|---------------------------------|-------------|
|             |       |               | Peak                  | 1 year     | Latency                         | Effector type                   | Memory      |
| HBB         |       | NM_000518     | 55.8                  | 23.3       | 6.8                             | <i>1.6</i>                      | <i>2.2</i>  |
| ATP2B4      |       | AK026443      | 27.8                  | 35.1       | 7.9                             | 5.4                             | 2.4         |
| SCD5        |       | AL831891      | 26.9                  | 30.3       | 6.2                             | <i>1.7</i>                      | <i>-1.0</i> |
| RRM2        |       | BC030154      | 26.8                  | 7.7        | 2.4                             | <i>1.0</i>                      | <i>1.0</i>  |
| SLC27A2     |       | NM_003645     | 23.5                  | 9.6        | 3.9                             | <i>1.2</i>                      | <i>1.4</i>  |
| HBA2        |       | NM_000517     | 14.6                  | 9.6        | 3.0                             | <i>1.3</i>                      | <i>1.1</i>  |
| SLC14A1     |       | AF263545      | 13.8                  | 12.2       | 5.2                             | <i>1.8</i>                      | <i>1.2</i>  |
| SLCO4C1     |       | AF119865      | 11.1                  | 22.1       | 11.5                            | 3.3                             | 2.0         |
| AYTL2       |       | NM_024830     | 10.1                  | 12.0       | 6.0                             | 5.8                             | 3.3         |
| GFOD1       |       | NM_018988     | 10.1                  | 12.4       | 7.0                             | 7.2                             | 2.7         |
| IDH2        |       | NM_002168     | 8.1                   | 3.6        | 1.9                             | 3.4                             | 2.1         |
| RRM2        |       | BC030154      | 8.0                   | <i>1.7</i> | <i>1.0</i>                      | -2.5                            | -4.7        |
| ENTPD1      |       | NM_001776     | 7.0                   | 10.2       | 1.3                             | <i>1.0</i>                      | <i>1.0</i>  |
| AQP9        |       | NM_020980     | 6.0                   | 3.6        | 4.9                             | <i>1.2</i>                      | <i>1.4</i>  |
| GLUL        |       | NM_002065     | 5.9                   | 8.2        | 10.4                            | 8.7                             | 6.8         |
| ACADM       |       | NM_000016     | 5.7                   | 2.7        | -1.8                            | <i>1.4</i>                      | <i>1.2</i>  |
| ADCY7       |       | NM_001114     | 5.3                   | 6.1        | 2.1                             | <i>1.8</i>                      | <i>1.1</i>  |
| G6PD        |       | M12996        | -8.1                  | -7.1       | -12.8                           | -8.7                            | -4.8        |
| EPHX2       |       | NM_001979     | -12.3                 | -9.0       | -10.9                           | -5.1                            | -4.5        |
| SLC16A10    |       | NM_018593     | -28.8                 | -25.6      | -24.4                           | <i>-1.6</i>                     | <i>-1.1</i> |
| AK5         |       | BC012467      | -30.6                 | -20.7      | -12.4                           | -4.7                            | -10.3       |

Numbers denote mean changes of replicate samples compared to the pool of purified naive CD8<sup>+</sup> T cells. Fold changes < 2 are denoted in italics.

## Supplemental Table 4

### Changes in expression of different categories of genes: BCL-2 family members

| Gene symbol | Alias   | Accession Nr. | Primary CMV infection |             | Healthy HCMV <sup>+</sup> donor | Healthy HCMV <sup>+</sup> donor |             |
|-------------|---------|---------------|-----------------------|-------------|---------------------------------|---------------------------------|-------------|
|             |         |               | Peak                  | 1 year      | Latency                         | Effector type                   | Memory      |
| BAD         |         | NM_004322     | <i>1.4</i>            | <i>1.3</i>  | <i>1.3</i>                      | <i>1.2</i>                      | <i>1.1</i>  |
| BAK         |         | BC004431      | <i>3.1</i>            | <i>2.1</i>  | <i>1.6</i>                      | <i>1.9</i>                      | <i>1.8</i>  |
| BAX         |         | NM_004324     | <i>-1.1</i>           | <i>-1.5</i> | <i>-1.1</i>                     | <i>1.0</i>                      | <i>1.0</i>  |
| BCL2        |         | AK022111      | <i>-1.3</i>           | <i>-1.2</i> | <i>-1.3</i>                     | <i>-3.3</i>                     | <i>-2.6</i> |
| BCL2A1      |         | NM_004049     | <i>1.7</i>            | <i>1.6</i>  | <i>1.5</i>                      | <i>-1.8</i>                     | <i>1.4</i>  |
| BCL2L12     |         | NM_138639     | <i>1.2</i>            | <i>-1.0</i> | <i>1.1</i>                      | <i>1.3</i>                      | <i>1.1</i>  |
| BCLG        | BCL2L14 | NM_030766     | <i>2.0</i>            | <i>-1.2</i> | <i>-1.2</i>                     | <i>-1.0</i>                     | <i>1.1</i>  |
| BCL-RAMBO   | BCL2L13 | NM_015367     | <i>1.8</i>            | <i>1.4</i>  | <i>-1.8</i>                     | <i>-1.3</i>                     | <i>-1.3</i> |
| BCL-W       |         | NM_004050     | <i>1.2</i>            | <i>1.0</i>  | <i>-1.5</i>                     | <i>1.3</i>                      | <i>1.2</i>  |
| BCL-XL      |         | NM_001191     | <i>-1.0</i>           | <i>1.1</i>  | <i>-1.1</i>                     | <i>-1.2</i>                     | <i>-1.1</i> |
| BCL-XS      | BCL2L1  | NM_001191     | <i>-1.0</i>           | <i>1.1</i>  | <i>-1.1</i>                     | <i>-1.2</i>                     | <i>-1.1</i> |
| BIK         |         | NM_001197     | <i>1.2</i>            | <i>-1.1</i> | <i>1.5</i>                      | <i>2.1</i>                      | <i>2.6</i>  |
| BIM         | BCL2L11 | AF455755      | <i>2.7</i>            | <i>1.3</i>  | <i>2.3</i>                      | <i>1.2</i>                      | <i>1.2</i>  |
| BOK         |         | NM_032515     | <i>-1.2</i>           | <i>-1.5</i> | <i>-1.2</i>                     | <i>-1.9</i>                     | <i>-1.4</i> |
| DIVA        | BCL2L10 | NM_020396     | <i>-1.8</i>           | <i>-1.8</i> | <i>-1.4</i>                     | <i>-1.2</i>                     | <i>-1.2</i> |
| MCL1        |         | NM_021960     | <i>1.9</i>            | <i>1.3</i>  | <i>1.9</i>                      | <i>1.6</i>                      | <i>2.2</i>  |

Numbers denote mean changes of replicate samples compared to the pool of purified naive CD8<sup>+</sup> T cells. Fold changes < 2 are denoted in italics.

## Supplemental Table 5

### Changes in expression of different categories of genes: Apoptosis

| Gene symbol    | Alias  | Accession Nr. | Primary CMV infection |            | Healthy HCMV* donor | Healthy HCMV* donor |             |
|----------------|--------|---------------|-----------------------|------------|---------------------|---------------------|-------------|
|                |        |               | Peak                  | 1 year     | Latency             | Effector type       | Memory      |
| <b>ANXA2</b>   |        | NM_004039     | 20.5                  | 18.2       | 7.8                 | 7.2                 | 6.8         |
| <b>ANXA4</b>   |        | NM_0011153    | 16.6                  | 8.3        | 2.3                 | <i>1.3</i>          | <i>-1.1</i> |
| <b>BIRC4BP</b> | XAF-1  | AK091799      | 16.1                  | 5.7        | <i>1.4</i>          | <i>1.4</i>          | <i>1.3</i>  |
| <b>ANXA2P3</b> |        | NR_001446     | 11.7                  | 10.3       | 5.3                 | 3.6                 | 5.3         |
| <b>DIP</b>     |        | AB018310      | 10.7                  | 10.7       | 2.9                 | 2.3                 | 2.7         |
| <b>ANXA5</b>   |        | NM_0011154    | 10.6                  | 7.9        | 4.6                 | 2.9                 | 3.2         |
| <b>UBE2C</b>   |        | NM_181803     | 10.5                  | <i>1.4</i> | <i>1.0</i>          | <i>1.1</i>          | <i>1.3</i>  |
| <b>CASP1</b>   |        | NM_033292     | 10                    | 4.5        | 2.5                 | 2.6                 | 1.7         |
| <b>TNFSF10</b> | TRAIL  | NM_003810     | 8.8                   | 2.7        | 2.4                 | <i>1.1</i>          | <i>1.0</i>  |
| <b>FASLG</b>   | TNFSF6 | NM_000639     | 7.2                   | 6.5        | 8.1                 | 3.0                 | 2.7         |
| <b>FAS</b>     | CD95   | AK026195      | 5.0                   | 4.0        | 4.7                 | <i>1.3</i>          | <i>1.8</i>  |
| <b>ENC1</b>    |        | AY049781      | 4.5                   | 6.6        | 11.4                | 8.2                 | 9.7         |
| <b>PMAIP1</b>  | NOXA   | BC032663      | 4.2                   | 1.9        | 17.1                | 4.5                 | 5.1         |
| <b>TP53</b>    | p53    | NM_000546     | 3.6                   | 2.9        | <i>-1.0</i>         | <i>-1.1</i>         | <i>-1.1</i> |
| <b>TP53I3</b>  | PIG3   | NM_004881     | 3.6                   | 2.2        | <i>1.2</i>          | <i>-1.1</i>         | <i>1.3</i>  |
| <b>TNFAIP3</b> |        | M59465        | -4.8                  | -3.5       | <i>-1.1</i>         | <i>1.6</i>          | <i>2.1</i>  |

Numbers denote mean changes of replicate samples compared to the pool of purified naive CD8<sup>+</sup> T cells. Fold changes < 2 are denoted in italics.

# Supplemental Table 6

## Changes in expression of different categories of genes: Transcription factors

| Gene symbol | Alias   | Accession Nr. | Primary CMV infection |        | Healthy HCMV <sup>+</sup> donor | Healthy HCMV <sup>+</sup> donor |             |
|-------------|---------|---------------|-----------------------|--------|---------------------------------|---------------------------------|-------------|
|             |         |               | Peak                  | 1 year | Latency                         | Effector type                   | Memory      |
| EOMES       |         | NM_005442     | 23.5                  | 27.0   | 14.4                            | 5.3                             | 6.1         |
| CEBPD       |         | NM_005195     | 19.9                  | 12.8   | 7.5                             | 5.1                             | 21.6        |
| CTBP2       |         | NM_022802     | 18.4                  | 23.7   | 5.4                             | 11.3                            | 2.2         |
| ZC3HAV1L    |         | BC020784      | 18.0                  | 2.5    | <i>1.1</i>                      | <i>1.8</i>                      | <i>1.5</i>  |
| ZEB2        | SIP1    | BC035706      | 17.9                  | 13.6   | 14.7                            | 4.0                             | 4.1         |
| MELK        |         | NM_014791     | 16.1                  | 6.4    | 2.7                             | 1.2                             | 1.2         |
| JAZF1       |         | NM_175061     | 15.6                  | 18.4   | 10.1                            | 5.9                             | 2.1         |
| TBX21       | T-bet   | NM_013351     | 15.2                  | 22.1   | 15.5                            | 17.6                            | 6.8         |
| ZNF683      |         | NM_173574     | 11.9                  | 10.1   | 12.1                            | 17.7                            | 4.7         |
| RNF135      |         | NM_032322     | 11.8                  | 9.5    | 6.0                             | 2.6                             | 3.1         |
| ASCL2       |         | BC028140      | 11.1                  | 24.8   | 4.6                             | 7.6                             | <i>1.0</i>  |
| PRDM1       | Blimp-1 | NM_001198     | 10.9                  | 10.5   | 12.0                            | 3.1                             | 5.4         |
| BATF        |         | NM_006399     | 10.7                  | 10.8   | 2.6                             | 6.7                             | 2.0         |
| ZBTB32      |         | NM_014383     | 10.3                  | 5.7    | 6.0                             | 2.5                             | 3.6         |
| E2F2        |         | BC007609      | 10.1                  | 3.4    | <i>1.3</i>                      | <i>1.1</i>                      | <i>1.3</i>  |
| IRF4        |         | NM_002460     | 10.0                  | 5.2    | 4.0                             | 5.6                             | 2.7         |
| MYBL1       |         | X66087        | 8.9                   | 17.0   | 12.5                            | 4.8                             | 2.8         |
| ZEB2        |         | NM_014795     | 8.7                   | 12.1   | 21.1                            | 9.8                             | 4.4         |
| ZFHX1B      | SIP1    | AK098835      | 7.6                   | 11.6   | 12.7                            | 7.0                             | 6.4         |
| SMAD3       |         | NM_015400     | 7.6                   | 11.5   | 9.7                             | 3.4                             | 3.6         |
| ZNF365      |         | NM_014951     | <i>-1.2</i>           | 6.6    | 48.4                            | 3.0                             | 1.8         |
| MYC         |         | NM_002467     | <i>-1.2</i>           | -6.9   | -8.9                            | -6.2                            | -2.1        |
| MYB         |         | NM_005375     | -3.6                  | -11.3  | -8.4                            | -2.6                            | -3.0        |
| LEF1        |         | AF086339      | -13.2                 | -17.0  | -15.2                           | -5.0                            | -5.3        |
| ZNF165      |         | NM_003447     | -14.6                 | -15.1  | -4.5                            | -3.5                            | 1.3         |
| ZNF395      | PBF     | NM_017606     | -14.9                 | -8.2   | <i>-1.3</i>                     | <i>-1.3</i>                     | <i>-1.5</i> |
| ZNF516      |         | NM_014643     | -16.3                 | -9.6   | -18.2                           | 4.9                             | 1.0         |
| ZMAT1       |         | AL831883      | -16.4                 | -6.5   | -2.3                            | -2.5                            | -2.9        |
| BACH2       |         | NM_021813     | -17.4                 | -12.1  | -9.8                            | -1.7                            | -1.7        |
| KLF7        |         | NM_003709     | -17.7                 | -13.2  | -13.6                           | -1.2                            | -1.8        |
| ZSCAN18     |         | NM_023926     | -18.5                 | -9.6   | -10.9                           | -5.6                            | -2.5        |
| ZNF238      |         | NM_006352     | -19.6                 | -17.0  | -6.4                            | <i>1.0</i>                      | <i>-1.4</i> |
| PLAG1       |         | NM_002655     | -30.5                 | -25.6  | -25.8                           | -13.3                           | -11.2       |
| ZNF516      |         | BM471507      | -30.6                 | -37.5  | -26.3                           | -9.9                            | -9.5        |
| NR3C2       |         | NM_000901     | -54.4                 | -28.1  | -4.8                            | -6.2                            | -4.0        |
| SCML1       |         | NM_006746     | -117.5                | -76.0  | -35.0                           | -4.2                            | -3.5        |

Numbers denote mean changes of replicate samples compared to the pool of purified naive CD8<sup>+</sup> T cells. Fold changes < 2 are denoted in italics.

## Supplemental Table 7

### Changes in expression of different categories of genes: Adhesion and migration

| Gene symbol | Alias                | Accession Nr. | Primary CMV infection |        | Healthy HCMV <sup>+</sup> donor | Healthy HCMV <sup>+</sup> donor |        |
|-------------|----------------------|---------------|-----------------------|--------|---------------------------------|---------------------------------|--------|
|             |                      |               | Peak                  | 1 year | Latency                         | Effector type                   | Memory |
| ITGAD       | CD11D                | I_964636      | 28.8                  | 17.4   | -1.3                            | 10.1                            | -1.5   |
| CX3CR1      |                      | NM_001337     | 83.5                  | 94.4   | 12.9                            | 10.1                            | -1.5   |
| CCR1        |                      | NM_001295     | 34.8                  | 7.9    | 2.9                             | -1.7                            | 1.6    |
| CCR5        |                      | NM_000579     | 33.5                  | 11.1   | 2.4                             | 2.1                             | 3.6    |
| VCAM1       |                      | NM_001078     | 23.7                  | 19.2   | 8.9                             | 1.4                             | 1.9    |
| CXCR6       |                      | I_948770      | 19.7                  | 11.0   | 5.0                             | 2.3                             | 22.8   |
| CD36        |                      | NM_000072     | 17.3                  | 13.1   | 4.4                             | 1.0                             | 1.0    |
| ADAM8       | CD156                | NM_001109     | 9.9                   | 13.1   | 8.4                             | 9.0                             | 5.7    |
| ITGB2       | LFA-1                | NM_000211     | 9.6                   | 11.3   | 4.6                             | 5.3                             | 2.0    |
| Tetraspan 2 |                      | I_937677      | 6.3                   | 7.3    | 1.9                             | 2.7                             | 1.9    |
| VCL         | Vinculin             | I_932014      | 3.4                   | 8.7    | 2.1                             | -1.2                            | -1.6   |
| ITGAL       | LFA-1                | NM_002209     | 4.9                   | 9.0    | 3.8                             | 3.0                             | 2.0    |
| ITGB1       |                      | NM_002211     | 3.8                   | 11.5   | 4.8                             | 6.7                             | 4.1    |
| PECAM1      |                      | NM_000442     | 3.1                   | 2.8    | -3.4                            | -2.9                            | -1.7   |
| SELL        | L-selectin,<br>CD62L | BC020758      | 1.2                   | -1.4   | -14.0                           | -3.8                            | -2.7   |
| ITGA6       | CD49f                | NM_000210     | -4.1                  | -3.9   | -10.7                           | -4.3                            | -3.9   |
| AMIGO1      |                      | AB032989      | -4.8                  | -2.9   | -7.0                            | -1.9                            | -2.5   |
| NRCAM       |                      | NM_005010     | -6.6                  | -5.9   | -5.1                            | -2.2                            | -2.1   |
| JAM3        |                      | NM_032801     | -8.2                  | -6.6   | -1.8                            | 1.2                             | 1.3    |
| ROBO1       |                      | NM_133631     | -27.2                 | -24.6  | -26.1                           | -2.5                            | -4.7   |
| CCR7        |                      | NM_001838     | -29.1                 | -26.6  | -29.5                           | -18.3                           | -3.4   |

Numbers denote mean changes of replicate samples compared to the pool of purified naive CD8<sup>+</sup> T cells. Fold changes < 2 are denoted in italics.

## Supplemental Table 8

### Changes in expression of different categories of genes: Cytokine receptors

| Gene symbol | Alias | Accession Nr. | Primary CMV infection |        | Healthy HCMV <sup>+</sup> donor | Healthy HCMV <sup>+</sup> donor |            |
|-------------|-------|---------------|-----------------------|--------|---------------------------------|---------------------------------|------------|
|             |       |               | Peak                  | 1 year | Latency                         | Effector type                   | Memory     |
| IL28RA      |       | NM_170743     | 8.4                   | 8.4    | 4.3                             | 3.3                             | 3.5        |
| IL2RB       | CD122 | NM_000878     | 5.5                   | 4.8    | 2.8                             | 4.0                             | 4.1        |
| IL2RG       | CD132 | NM_000206     | 4.9                   | 5.1    | 1.6                             | <i>1.1</i>                      | <i>1.0</i> |
| IL18R1      |       | NM_003855     | 4.7                   | 6.3    | 9.1                             | 2.7                             | 3.3        |
| IL6R        |       | X12830        | -5.4                  | -3.7   | -6.6                            | -4.1                            | -8.3       |
| IL7RA       |       | I_1002172     | -30.8                 | -14.7  | -5.0                            | -6.0                            | -1.2       |

Numbers denote mean changes of replicate samples compared to the pool of purified naive CD8<sup>+</sup> T cells. Fold changes < 2 are denoted in italics.



## Supplemental Table 9

### Changes in expression of different categories of genes: Exhaustion and differentiation

| Gene symbol | Alias   | Accession Nr. | Primary CMV infection |        | Healthy HCMV <sup>+</sup> donor | Healthy HCMV <sup>+</sup> donor |        |
|-------------|---------|---------------|-----------------------|--------|---------------------------------|---------------------------------|--------|
|             |         |               | Peak                  | 1 year | Latency                         | Effector type                   | Memory |
| CD38        |         | NM_001775     | 37.0                  | 3.0    | 1.5                             | 1.5                             | 2.4    |
| F2R         |         | NM_020182     | 22.8                  | 27.6   | 22.0                            | 5.5                             | 9.7    |
| SLAMF7      |         | NM_003242     | 21.0                  | 25.7   | 15.4                            | 5.8                             | 3.1    |
| LAG3        |         | NM_002286     | 18.3                  | 17.3   | 13.0                            | 7.2                             | 6.8    |
| VSTM3       |         | NM_003243     | 18.1                  | 10.7   | 4.3                             | 2.7                             | 3.1    |
| PDGFD       |         | NM_000218     | 17.1                  | 24.8   | 6.3                             | 1.7                             | 1.2    |
| TSPAN5      |         | NM_002526     | 13.6                  | 9.8    | 3.6                             | 4.2                             | 2.9    |
| CD160       |         | NM_007053     | 13.6                  | 14.5   | 10.1                            | 1.3                             | -1.1   |
| CD244       | 2B4     | NM_016382     | 13.5                  | 10.6   | 7.1                             | 1.4                             | 1.3    |
| TSPAN2      |         | NM_003498     | 13.1                  | 12.9   | 1.0                             | 1.3                             | -1.0   |
| EDG8        |         | AK026295      | 12.5                  | 15.6   | 16.3                            | 12.8                            | 9.2    |
| HAVCR2      | TIM3    | BC020843      | 11.6                  | 7.2    | 2.4                             | -1.3                            | 1.2    |
| SLAMF6      |         | NM_015103     | 11.5                  | 11.7   | 1.9                             | 1.3                             | 1.2    |
| CD70        |         | NM_001252     | 10.1                  | 4.5    | 2.7                             | 1.6                             | 1.4    |
| KLRG1       |         | NM_005810     | 9.6                   | 17.5   | 8.0                             | 1.1                             | 1.0    |
| KLRC1       | NKG2A   | NM_002259     | 9.0                   | 8.0    | 1.2                             | 8.2                             | 2.1    |
| TGFBR3      |         | BC024020      | 7.7                   | 11.1   | 11.8                            | 9.5                             | 6.1    |
| PTGER2      |         | NM_000956     | 7.3                   | 6.1    | 3.4                             | 1.6                             | 1.1    |
| TMEM49      |         | NM_030760     | 6.1                   | 8.7    | 5.0                             | 6.7                             | 6.4    |
| PDCD1       | PD-1    | NM_005018     | 2.9                   | 6.2    | 3.5                             | 1.2                             | 3.4    |
| CTLA4       |         | AY209009      | 2.4                   | 2.2    | 1.2                             | -1.3                            | -1.3   |
| CD27        |         | NM_001242     | 2.3                   | 1.6    | -3.1                            | -1.9                            | -1.3   |
| PLXND1      |         | NM_015103     | 1.0                   | 6.9    | 13.8                            | 9.0                             | 13.1   |
| CD28        |         | NM_006139     | -2.8                  | -14.2  | -12.5                           | -13.3                           | -1.0   |
| SERINC5     | TPO1    | NM_005725     | -6.0                  | -15.1  | -9.9                            | -7.2                            | -4.4   |
| TGFBR2      |         | NM_005723     | -7.1                  | -5.9   | -3.8                            | -2.6                            | -3.1   |
| SNN         | Stannin | AL833175      | -8.0                  | -10.0  | -12.6                           | -10.4                           | -4.3   |
| NT5E        | CD73    | NM_002526     | -10.2                 | -5.9   | -5.6                            | -1.3                            | -1.8   |
| KCNQ1       |         | NM_052931     | -12.02                | -9.5   | -10.0                           | -19.9                           | -4.8   |
| TMEPAI      |         | NM_001992     | -14.4                 | -15.8  | -2.1                            | -1.7                            | 5.1    |
| VIPR1       |         | NM_004624     | -17.5                 | -7.5   | -9.4                            | -2.8                            | -1.8   |
| MAL         |         | NM_001775     | -23.7                 | -17.6  | -18.4                           | -7.8                            | -3.8   |

Numbers denote mean changes of replicate samples compared to the pool of purified naive CD8<sup>+</sup> T cells. Fold changes < 2 are denoted in italics.

# Supplemental Table 10

## Changes in expression of different categories of genes: Effector molecules

| Gene symbol               | Alias          | Accession Nr. | Primary CMV infection |        | Healthy HCMV* donor | Healthy HCMV* donor |        |
|---------------------------|----------------|---------------|-----------------------|--------|---------------------|---------------------|--------|
|                           |                |               | Peak                  | 1 year | Latency             | Effector type       | Memory |
| <b>Cytokines</b>          |                |               |                       |        |                     |                     |        |
| IL32                      |                | NM_004221     | 8.3                   | 9.9    | 1.6                 | 2.0                 | 1.6    |
| IL1B                      |                | NM_000576     | 1.2                   | 6.4    | 24.6                | -1.6                | -1.0   |
| IL23A                     |                | NM_016584     | -14.2                 | -14.4  | -5.2                | -5.3                | -1.6   |
| <b>Chemokines</b>         |                |               |                       |        |                     |                     |        |
| IL8                       | CXCL8          | NM_000584     | 29.2                  | 24.4   | 73.7                | 1.8                 | 2.3    |
| CCL4                      | Mip-1 $\beta$  | NM_002984     | 26.5                  | 47.2   | 52.4                | 16.1                | 8.7    |
| CCL5                      | Rantes         | NM_002985     | 11.4                  | 21.2   | 16.2                | 12.7                | 10.2   |
| CKLF                      |                | NM_016326     | 10.8                  | 8.0    | 2.2                 | 1.5                 | 1.8    |
| XCL1                      |                | NM_002995     | 8.3                   | 5.0    | 4.7                 | 4.9                 | 3.4    |
| CXCL7                     |                | NM_002704     | 8.2                   | 6.2    | 3.8                 | 1.0                 | -1.2   |
| CCL3                      | Mip-1 $\alpha$ | NM_002983     | 7.9                   | 7.5    | 14.8                | 5.9                 | 2.8    |
| CCL3L1                    |                | NM_021006     | 7.0                   | 6.5    | 13.3                | 2.2                 | 1.3    |
| XCL2                      |                | NM_003175     | 6.7                   | 4.6    | 4.1                 | 3.9                 | 2.8    |
| CMTM1                     |                | NM_052999     | 6.5                   | 4.0    | 2.6                 | 1.0                 | 1.0    |
| CXCL4                     |                | NM_002619     | 5.7                   | 3.8    | 1.6                 | -1.2                | -1.1   |
| CXCL10                    | IP10           | NM_001565     | 4.9                   | 1.6    | 7.3                 | 1.1                 | 1.2    |
| CCL23                     |                | NM_005064     | 4.5                   | 1.6    | 7.6                 | 1.2                 | 1.4    |
| CXCL2                     |                | NM_002089     | 2.1                   | 3.0    | 8.1                 | 1.1                 | 1.3    |
| CMTM8                     |                | NM_178868     | -2.6                  | -7.8   | -5.6                | -6.7                | -2.7   |
| <b>Effector molecules</b> |                |               |                       |        |                     |                     |        |
| GZMA                      |                | I_958171      | 69.9                  | 64.0   | 27.1                | 33.0                | 16.1   |
| S100A8                    |                | NM_002964     | 63.8                  | 50.2   | 24.2                | 1.6                 | 2.1    |
| GZMB                      |                | NM_004131     | 51.2                  | 49.4   | 48.6                | 22.3                | 1.8    |
| LYZ                       |                | NM_000239     | 24.8                  | 28.8   | 29.2                | -1.2                | 1.0    |
| GZMH                      |                | NM_033423     | 23.1                  | 32.7   | 27.6                | 23.9                | 4.4    |
| GNLY                      |                | NM_006433     | 19.5                  | 25.4   | 19.5                | 16.9                | 5.3    |
| SPON2                     |                | NM_012445     | 18.6                  | 17.8   | 16.7                | 19.3                | 1.9    |
| CKLF                      |                | NM_016951     | 10.2                  | 7.1    | 2.0                 | 1.1                 | 1.0    |
| S100A9                    |                | NM_002965     | 17.6                  | 20.3   | 17.8                | 1.0                 | 1.0    |
| FGFBP2                    |                | NM_031950     | 13.8                  | 30.5   | 29.2                | 20.8                | 2.6    |
| GZMK                      |                | NM_002104     | 13.5                  | 7.3    | 3.0                 | 4.3                 | 10.4   |
| PRF1                      |                | NM_005041     | 10.3                  | 12.7   | 5.5                 | 4.4                 | 2.6    |
| PROK2                     |                | NM_021935     | 1.3                   | 9.8    | 32.4                | 41.6                | 1.4    |
| TGFB1                     |                | NM_000660     | -1.1                  | 2.3    | 2.8                 | 4.8                 | 6.4    |
| LTB                       |                | NM_002341     | -8.1                  | -10.3  | -11.3               | -7.5                | -1.3   |
| SECTM1                    |                | NM_003004     | 15.3                  | 14.7   | 5.2                 | 1.1                 | 1.0    |
| BTBD11                    |                | NM_152322     | -10.3                 | -19.3  | -5.6                | -2.7                | 1.2    |
| PCSK5                     |                | AK023096      | -11.9                 | -11.8  | -19.6               | -1.8                | -3.9   |
| NELL2                     |                | NM_006159     | -13.2                 | -12.6  | -36.5               | -11.4               | -2.3   |
| TANC2                     |                | AB032974      | -14.6                 | -14.1  | -1.5                | 1.2                 | -1.3   |
| SCGB3A1                   |                | NM_013409     | -18.3                 | -10.4  | -9.9                | -2.1                | -2.3   |
| SPINK2                    |                | NM_052863     | -18.7                 | -21.6  | -17.8               | -10.5               | -7.8   |
| CA6                       |                | NM_021114     | -43.9                 | -31.2  | -24.7               | -4.3                | -5.5   |

Numbers denote mean changes of replicate samples compared to the pool of purified naive CD8<sup>+</sup> T cells. Fold changes < 2 are denoted in italics.

## Supplemental Table 11

### Changes in expression of different categories of genes: Genes regulated by IFN $\gamma$

| Gene symbol | Accession Nr. | Primary CMV infection |             | Healthy HCMV <sup>+</sup> donor | Healthy HCMV <sup>+</sup> donor |             |
|-------------|---------------|-----------------------|-------------|---------------------------------|---------------------------------|-------------|
|             |               | Peak                  | 1 year      | Latency                         | Effector type                   | Memory      |
| IFNG        | NM_000619     | 38.8                  | 42.4        | 53.6                            | 16.8                            | 7.7         |
| IFI27       | NM_005532     | 25.3                  | 17.3        | <i>1.5</i>                      | <i>1.3</i>                      | <i>1.3</i>  |
| IFI16       | I_1997689     | 20.5                  | 25.6        | 15.8                            | 11.4                            | 7.4         |
| OAS1        | NM_002534     | 18.2                  | 4.7         | <i>1.4</i>                      | <i>1.7</i>                      | <i>1.2</i>  |
| IFI44L      | NM_006820     | 11.5                  | -1.4        | <i>-1.6</i>                     | <i>-1.3</i>                     | <i>-1.3</i> |
| IFI30       | J03909        | 11.5                  | 10.9        | 4.8                             | <i>-1.1</i>                     | <i>-1.1</i> |
| IRF4        | NM_002460     | 10.0                  | 5.2         | 4.0                             | 5.6                             | 2.7         |
| ISG15       | NM_005101     | 9.0                   | 2.5         | <i>1.6</i>                      | <i>1.6</i>                      | <i>1.5</i>  |
| IFIT1       | NM_001548     | 7.8                   | -1.2        | 13.7                            | 3.9                             | 2.0         |
| IFIT3       | NM_001549     | 7.0                   | <i>1.2</i>  | 24.8                            | 5.8                             | 2.8         |
| MX1         | NM_002462     | 5.3                   | <i>-1.6</i> | <i>-2.0</i>                     | <i>-2.8</i>                     | <i>-1.1</i> |
| ISG20       | NM_002201     | 4.6                   | 1.9         | <i>2.0</i>                      | <i>1.8</i>                      | <i>1.8</i>  |
| OASL        | NM_003733     | 4.4                   | 2.1         | 18.9                            | 15.2                            | 6.1         |
| IFIT2       | NM_001547     | 2.7                   | <i>1.2</i>  | 18.9                            | 7.9                             | 2.3         |
| IFIT2       | BC005987      | 2.3                   | <i>1.5</i>  | 20.5                            | 17.1                            | 4.8         |
| IFNAR1      | NM_000629     | -1.6                  | -1.7        | -2.6                            | <i>-1.4</i>                     | <i>1.3</i>  |
| IFNGR2      | NM_005534     | -3.7                  | -4.0        | -3.7                            | -3.0                            | -3.3        |

Numbers denote mean changes of replicate samples compared to the pool of purified naive CD8<sup>+</sup> T cells. Fold changes < 2 are denoted in italics.

Supplemental Table 12: Genes with similar fold change between latent HCMV and exhausted LCMV CD8<sup>+</sup> T cells

| Agilent ID   | Symbol | Affymetrix ID | HCMV   | LCMV  |
|--------------|--------|---------------|--------|-------|
| A_23_P343398 | CCR7   | 104443_at     | -29.55 | -5.99 |
| A_24_P20630  | LEF1   | 103629_g_at   | -24.96 | -5.39 |
| A_23_P213045 | LEF1   | 103629_g_at   | -15.25 | -5.39 |
| A_23_P103522 | SELL   | 102838_at     | -14.03 | -3.15 |
| A_23_P204208 | KLRD1  | 93677_at      | 33.57  | -2.5  |
| A_23_P105957 | ACTN1  | 104578_f_at   | -19.28 | -2.43 |
| A_23_P93348  | LTB    | 102940_at     | -11.26 | -2.31 |
| A_23_P68601  | CST7   | 102638_at     | 23.31  | 2.12  |
| A_24_P261760 | KLRG1  | 95320_at      | 11.96  | 2.59  |
| A_23_P116942 | LAG3   | 98392_at      | 13.02  | 3.25  |
| A_23_P213562 | F2R    | 95474_at      | 22.03  | 3.26  |
| A_23_P350451 | PRDM1  | 92904_at      | 12.02  | 3.56  |
| A_23_P206284 | GPR56  | 102787_at     | 10.58  | 3.85  |
| A_23_P207564 | CCL4   | 94146_at      | 52.38  | 4.01  |
| A_23_P354341 | CD160  | 102272_at     | 10.09  | 4.08  |
| A_23_P151294 | IFNG   | 99334_at      | 53.62  | 9.12  |
| A_24_P97374  | EOMES  | 103532_at     | 14.4   | 10.58 |
| A_24_P228130 | CCL3L3 | 102424_at     | 13.3   | 10.69 |
| A_23_P133445 | GZMA   | 102995_s_at   | 27.07  | 11.18 |
| A_23_P117602 | GZMB   | 102877_at     | 48.56  | 15.09 |
| A_23_P152838 | CCL5   | 98406_at      | 16.18  | 23.46 |

Numbers denote mean changes of replicate samples compared to the pool of purified naive CD8<sup>+</sup> T cells.

# Supplemental Figure 1

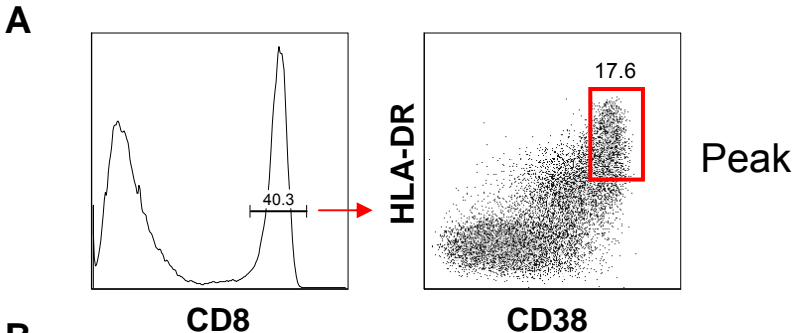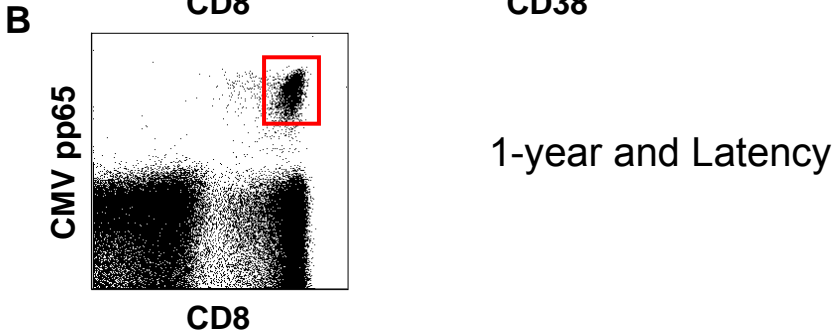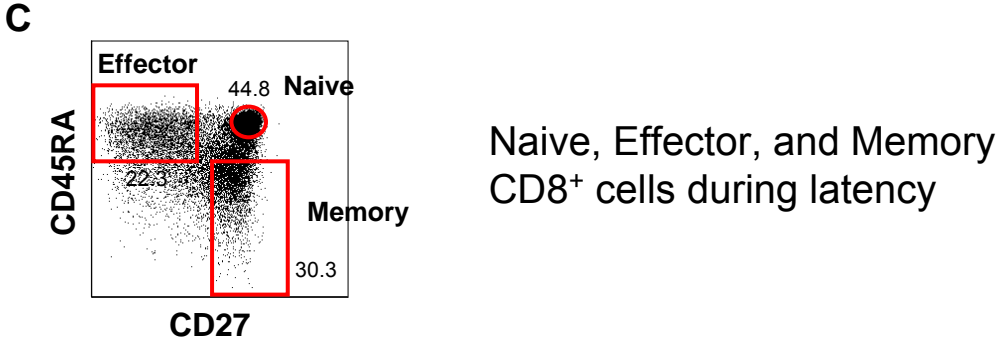

Sort windows of microarray samples. (A) To obtain HCMV-specific cells for RNA isolation, at the peak of the HCMV infection all highly activated cells were sorted (CD8<sup>+</sup>CD38<sup>+</sup>HLA-DR<sup>+</sup>). (B) Cells at 1-year and latency were sorted with HCMV-pp65 tetramers. (C) Sort windows for naive (CD8<sup>+</sup>CD45RA<sup>+</sup>CD27<sup>+</sup>), effector-type (CD8<sup>+</sup>CD45RA<sup>+</sup>CD27<sup>-</sup>), and memory-type cells (CD8<sup>+</sup>CD45RA<sup>-</sup>CD27<sup>+</sup>).

# Supplemental Figure 2

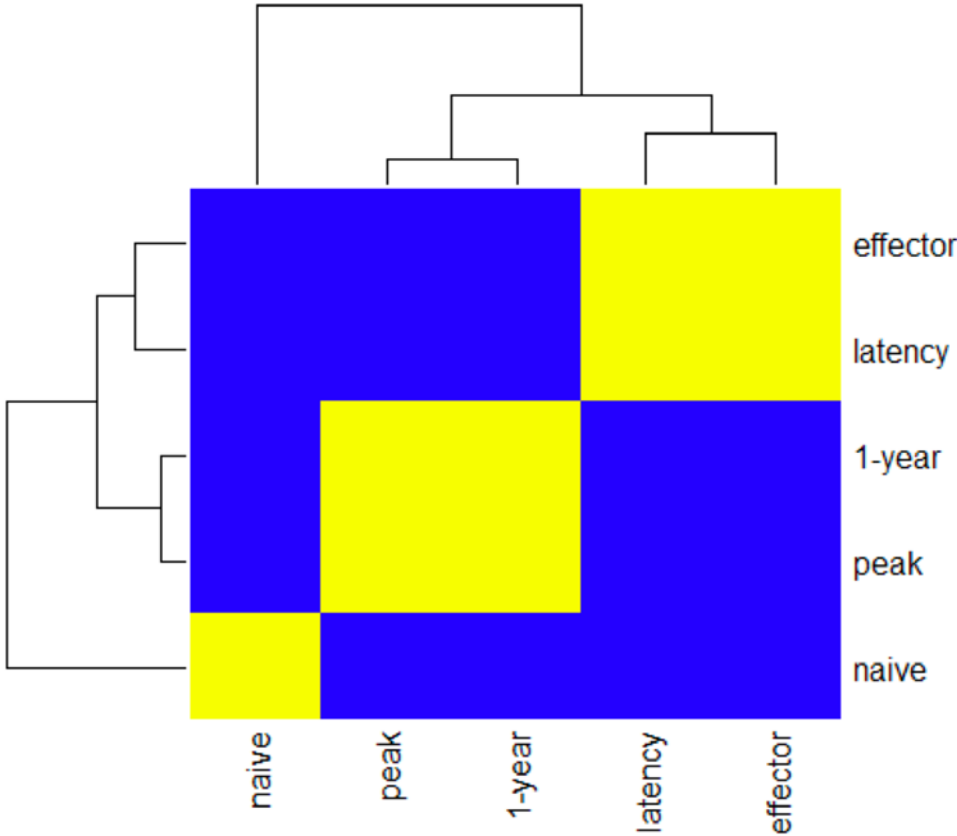

Consensus matrix for the hierarchical clustering of Figure 1A. The consensus matrix is a visual representation of the clustering results and the stability of the sample clusters across 200 bootstrap samples. Samples that remain consistently clustered together across different bootstrap samples have a high consensus. Blue indicates no consensus, yellow indicates maximal consensus across bootstrap samples from the original data. Note that the clustering in three groups (naive), (peak, 1-year), (latency, effector) is highly stable.

# Supplemental Figure 3

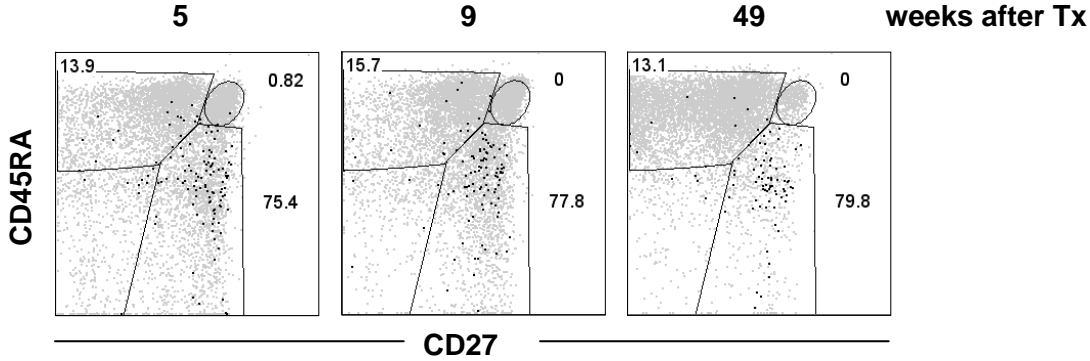

EBV-reactive cells during the primary HCMV infection have a memory phenotype. At the timepoints pre and during HCMV infection (weeks 5, 9, and 49) EBV tetramer<sup>+</sup> cells express markers indicating a stable predominantly memory (CD8<sup>+</sup>CD45RA<sup>-</sup>CD27<sup>+</sup>) phenotype.

# Supplemental Figure 4

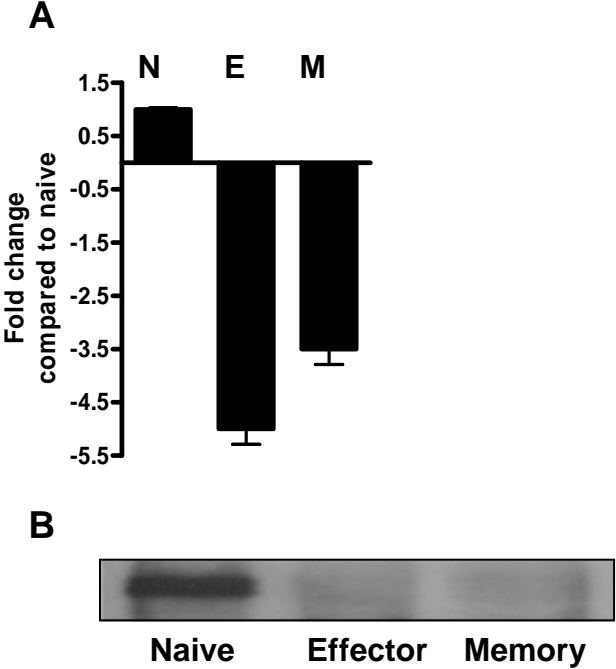

LEF-1 RNA and protein levels. (A) qPCR of sorted effector and memory CD8<sup>+</sup> cells in latency. Expression is measured as fold change compared to a pool of naive CD8<sup>+</sup> cells. (B) Western blot showing low amounts of LEF-1 protein in effector and memory CD8<sup>+</sup> cells.



Supplemental Figure 5

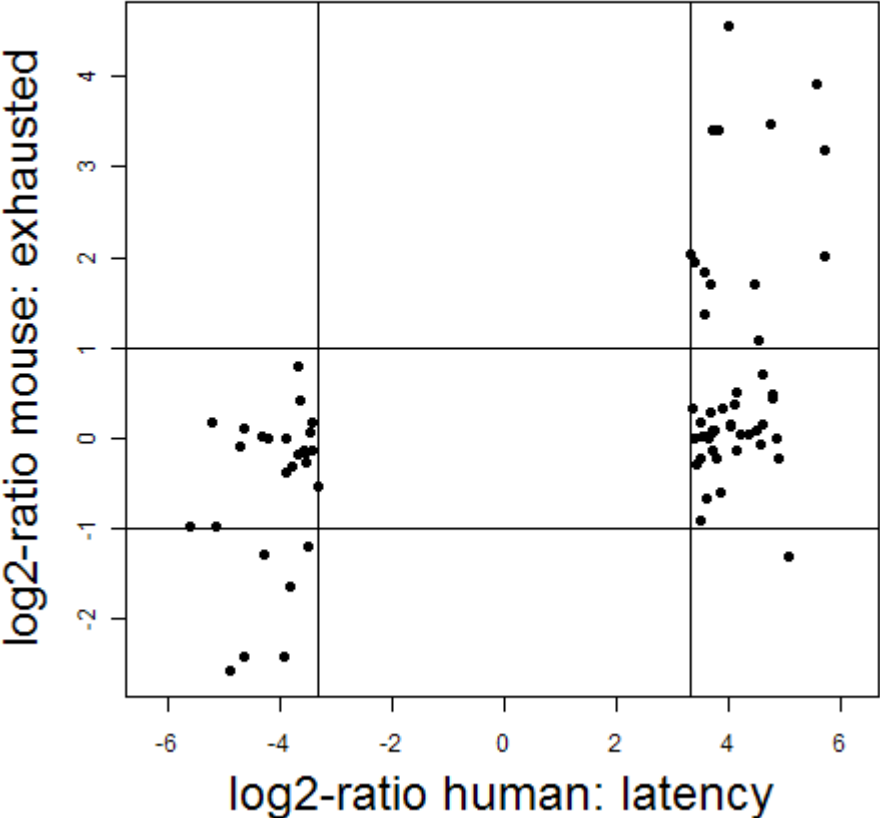

Comparison of expression of genes regulated in latent HCMV-specific cells with exhausted murine LCMV-specific CD8<sup>+</sup> cells. Scatterplot for genes that were up- or downregulated significantly (corrected  $P \leq 1 \times 10^{-10}$ ) and 10-fold or greater in the latent HCMV-specific CD8<sup>+</sup> T cells and that could be mapped to Affymetrix mouse probesets (n = 73) versus the orthologous mouse genes in exhausted LCMV-reactive cells.
